# Supplementary material for: A multifunctional AIEgen with high cell-penetrating ability for intracellular fluorescence assays, imaging and drug delivery
Source: Royal Society of Chemistry journal article supplement (doi:10.1039/c9qm00089e), 2019-01-01
Supplement: c9qm00089e1.pdf [file c9qm00089e1.pdf]

*Electronic Supplementary Information (ESI) for:*

**Multifunctional AIEgen with high cell-penetrating ability for intracellular fluorescent assay, imaging and drug delivery**

Yan Jie Li,<sup>a, b</sup> Hao Tian Zhang,<sup>a, b</sup> Xiao Ying Chen,<sup>a, b</sup> Peng Fei Gao<sup>a</sup> and Chang-Hua Hu<sup>\*,a,b</sup>

<sup>a</sup> College of Pharmaceutical Sciences, Southwest University, Chongqing 400715, China.

<sup>b</sup> Engineer Research Center of Chongqing Pharmaceutical Process and Quality Control, Chongqing 400715, China.

\*Address correspondence to Chang-Hua Hu (chhu@swu.edu.cn).

Supporting figures.

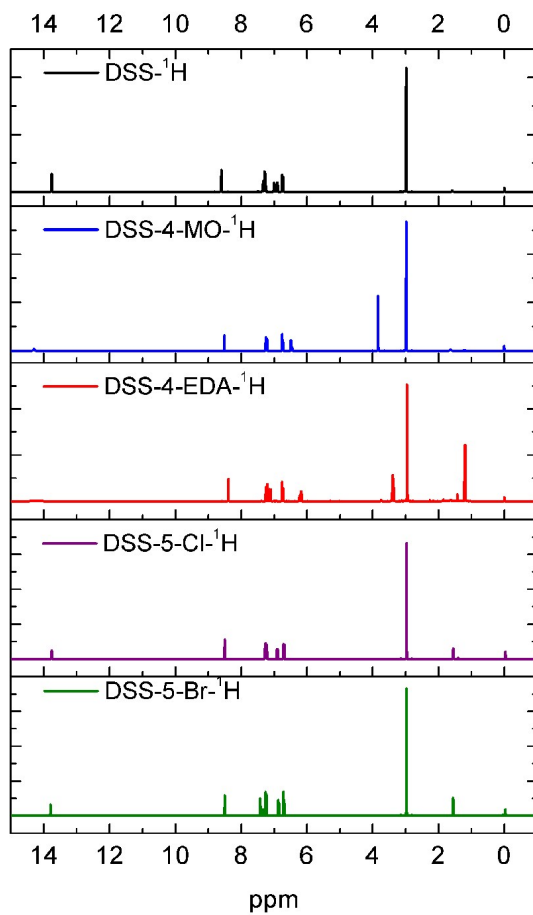

Figure S1 <sup>1</sup>H-NMR spectra of the DSS and the four derivatives.

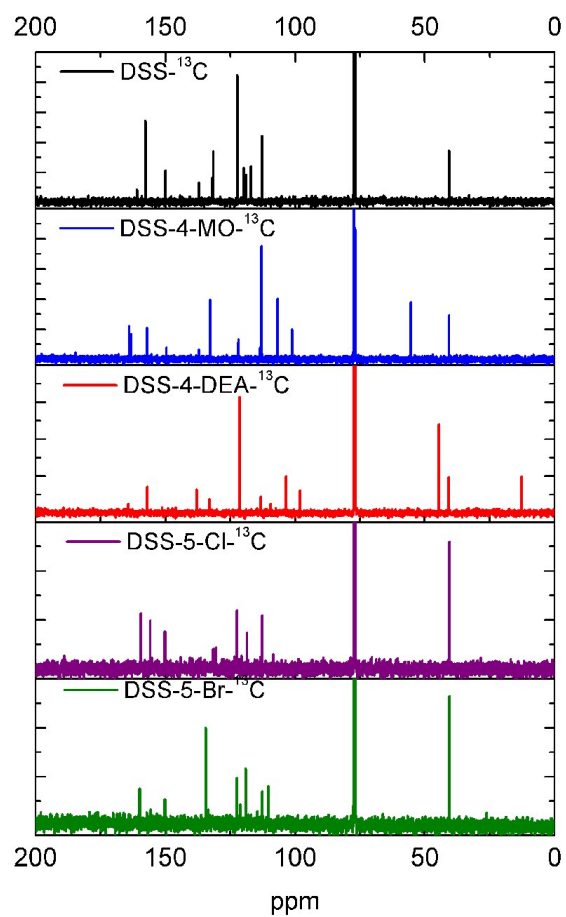

**Figure S2**  $^{13}\text{C}$ -NMR spectra of the DSS and the four derivatives.

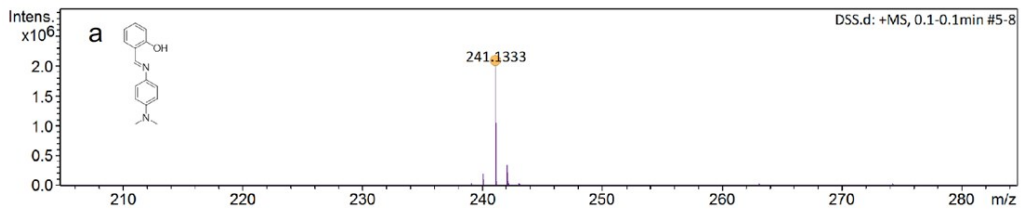

| Meas. m/z | # | Ion Formula                                      | m/z      | err [ppm] | mSigma | # mSigma | Score  | rdb | e <sup>-</sup> Conf | N-Rule |
|-----------|---|--------------------------------------------------|----------|-----------|--------|----------|--------|-----|---------------------|--------|
| 241.1333  | 1 | C <sub>15</sub> H <sub>17</sub> N <sub>2</sub> O | 241.1335 | 0.9       | 1.0    | 1        | 100.00 | 9.0 | even                | ok     |

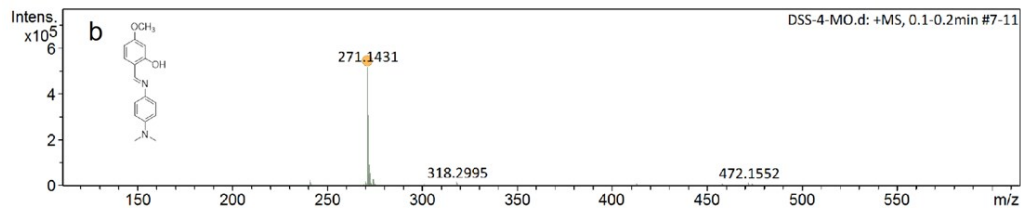

| Meas. m/z | # | Ion Formula                                                   | m/z      | err [ppm] | mSigma | # mSigma | Score  | rdb | e <sup>-</sup> Conf | N-Rule |
|-----------|---|---------------------------------------------------------------|----------|-----------|--------|----------|--------|-----|---------------------|--------|
| 271.1431  | 1 | C <sub>16</sub> H <sub>19</sub> N <sub>2</sub> O <sub>2</sub> | 271.1441 | 3.8       | 4.2    | 1        | 100.00 | 9.0 | even                | ok     |

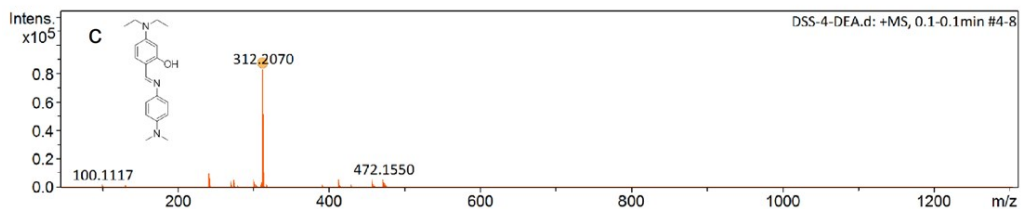

| Meas. m/z | # | Ion Formula                                      | m/z      | err [ppm] | mSigma | # mSigma | Score  | rdb | e <sup>-</sup> Conf | N-Rule |
|-----------|---|--------------------------------------------------|----------|-----------|--------|----------|--------|-----|---------------------|--------|
| 312.2070  | 1 | C <sub>19</sub> H <sub>26</sub> N <sub>3</sub> O | 312.2070 | 0.2       | 2.2    | 1        | 100.00 | 9.0 | even                | ok     |

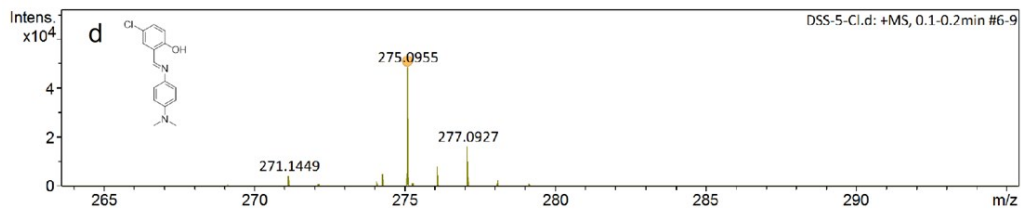

| Meas. m/z | # | Ion Formula                                        | m/z      | err [ppm] | mSigma | # mSigma | Score  | rdb | e <sup>-</sup> Conf | N-Rule |
|-----------|---|----------------------------------------------------|----------|-----------|--------|----------|--------|-----|---------------------|--------|
| 275.0955  | 1 | C <sub>15</sub> H <sub>16</sub> ClN <sub>2</sub> O | 275.0946 | -3.5      | 3.8    | 1        | 100.00 | 9.0 | even                | ok     |

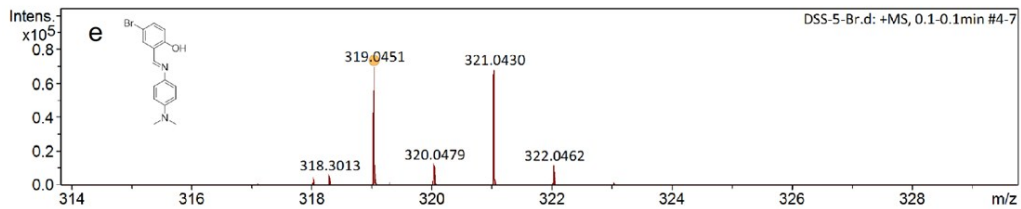

| Meas. m/z | # | Ion Formula                                        | m/z      | err [ppm] | mSigma | # mSigma | Score  | rdb | e <sup>-</sup> Conf | N-Rule |
|-----------|---|----------------------------------------------------|----------|-----------|--------|----------|--------|-----|---------------------|--------|
| 319.0451  | 1 | C <sub>15</sub> H <sub>16</sub> BrN <sub>2</sub> O | 319.0441 | -3.2      | 7.0    | 1        | 100.00 | 9.0 | even                | ok     |

**Figure S3** High resolution mass spectra of the DSS and the four derivatives.

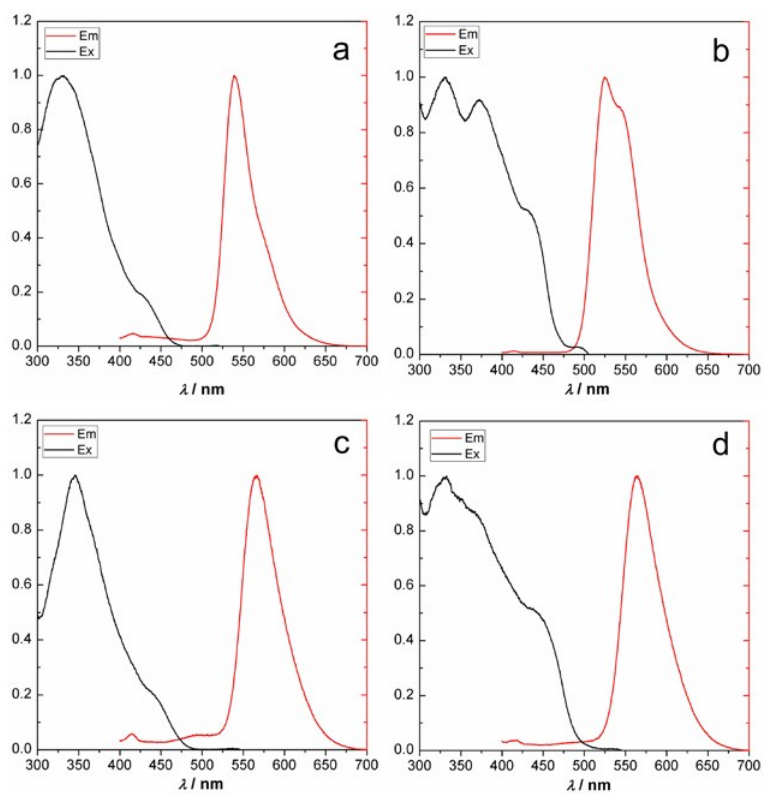

**Figure S4** Excitation and emission spectra of the DSS and the four derivatives (DMSO/water, water fraction 99%).

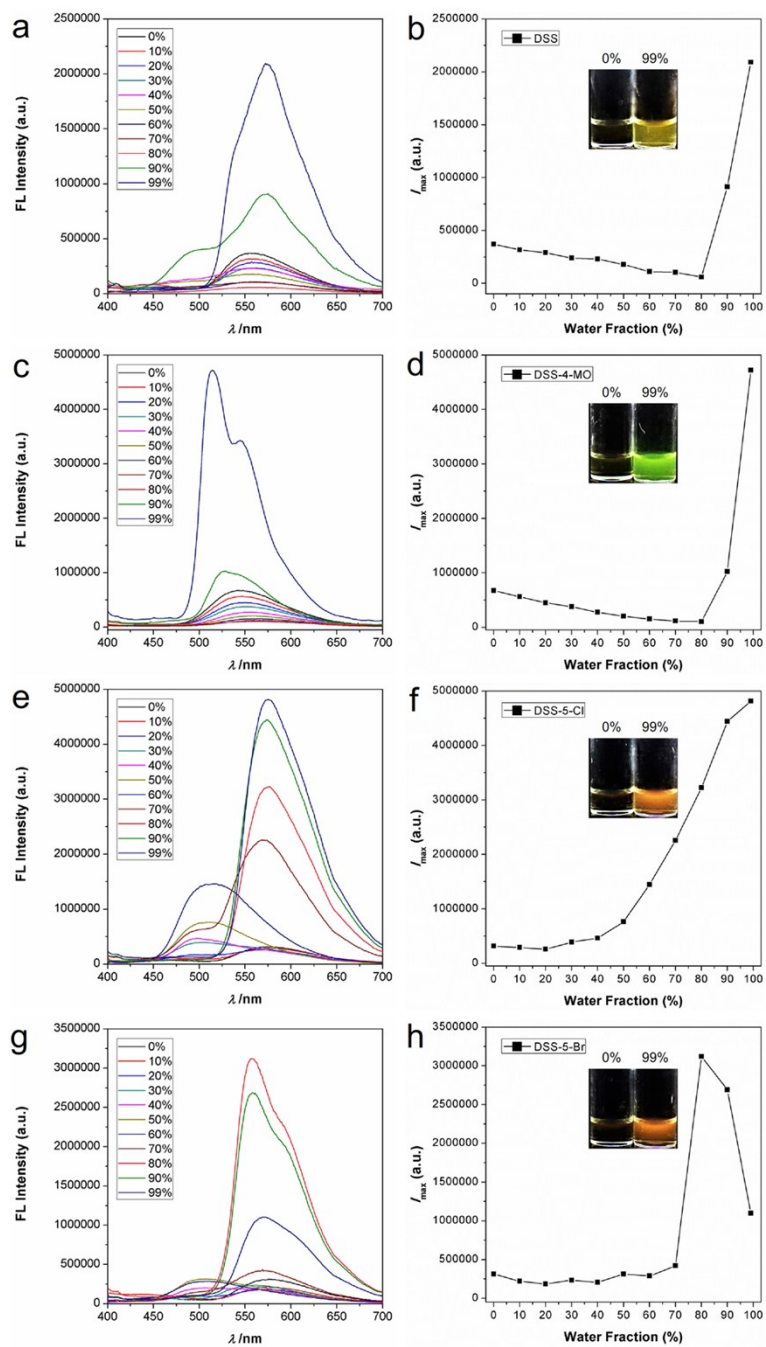

**Figure S5** Photoluminescence (PL) spectra (a-e) and AIE curves (f-j) of DSS and four derivatives in DMSO/water mixtures with different water fractions.

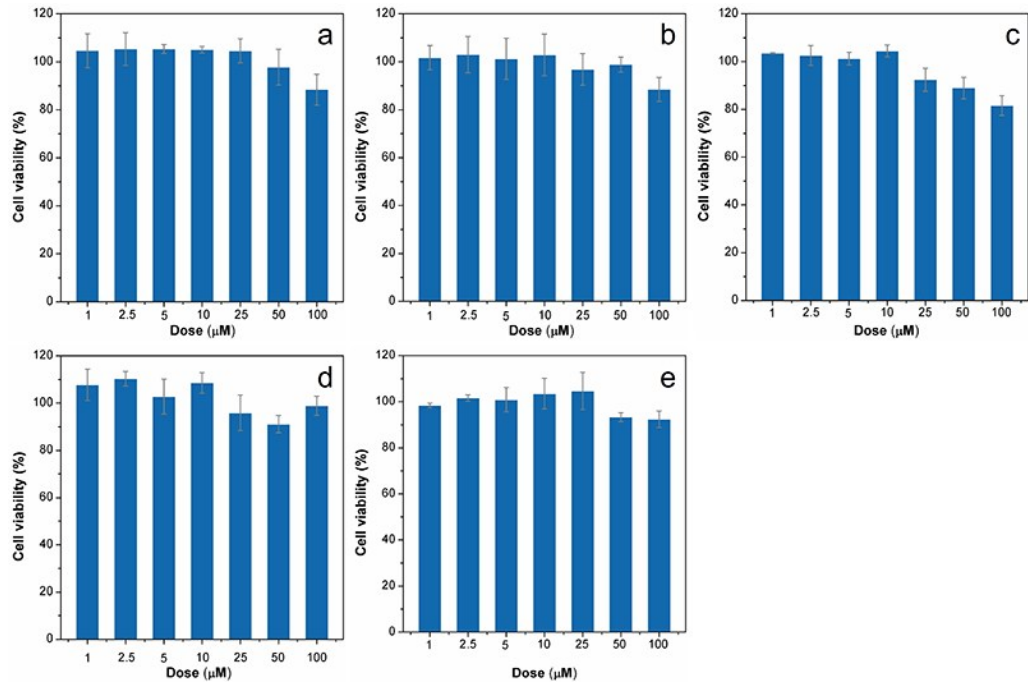

**Figure S6** The cytotoxicity of DSS and four derivatives on HeLa cells.

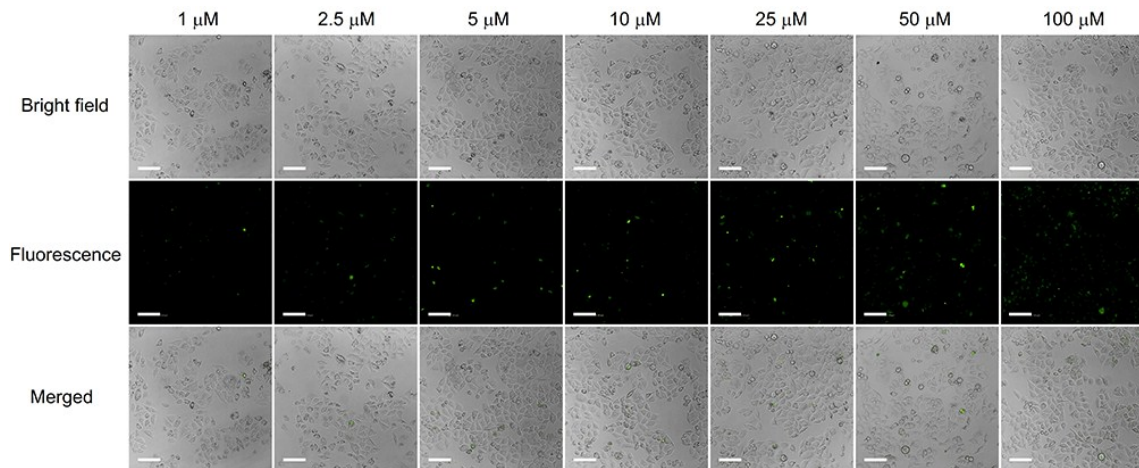

**Figure S7** Fluorescence images of HeLa cells stained with different concentrations of DSS in 30 min. Scale bar 100  $\mu\text{m}$ .

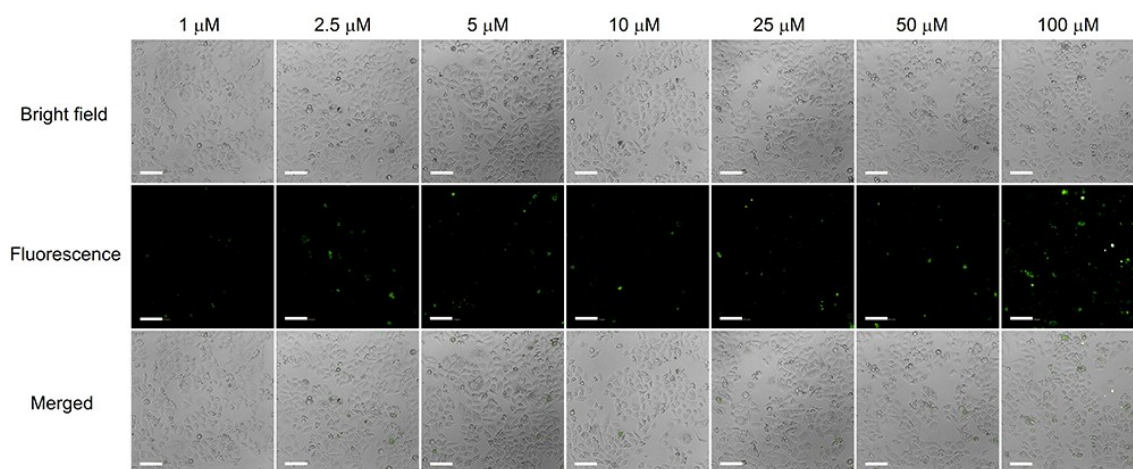

**Figure S8** Fluorescence images of HeLa cells stained with different concentrations of DSS-4-MO in 30 min. Scale bar 100  $\mu$ m.

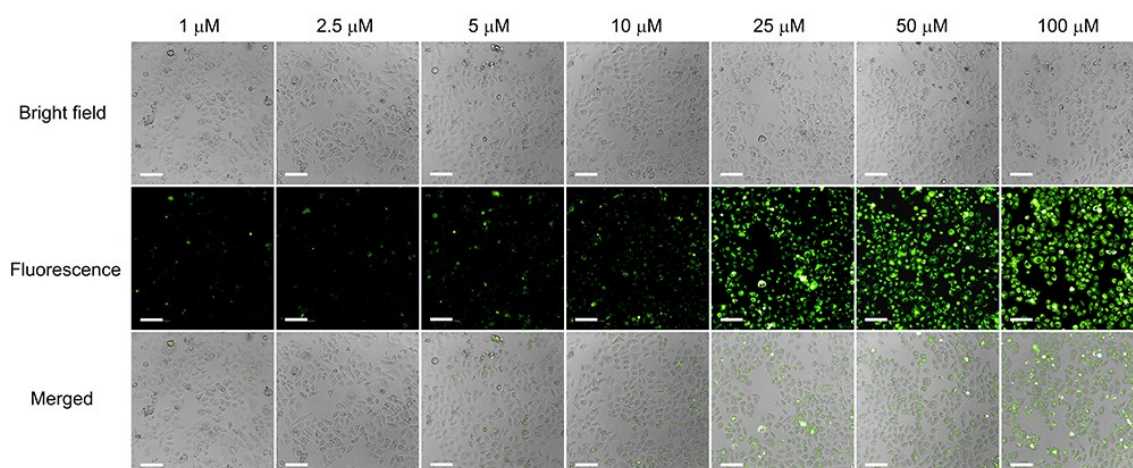

**Figure S9** Fluorescence images of HeLa cells stained with different concentrations of DSS-4-DEA in 30 min. Scale bar 100  $\mu$ m.



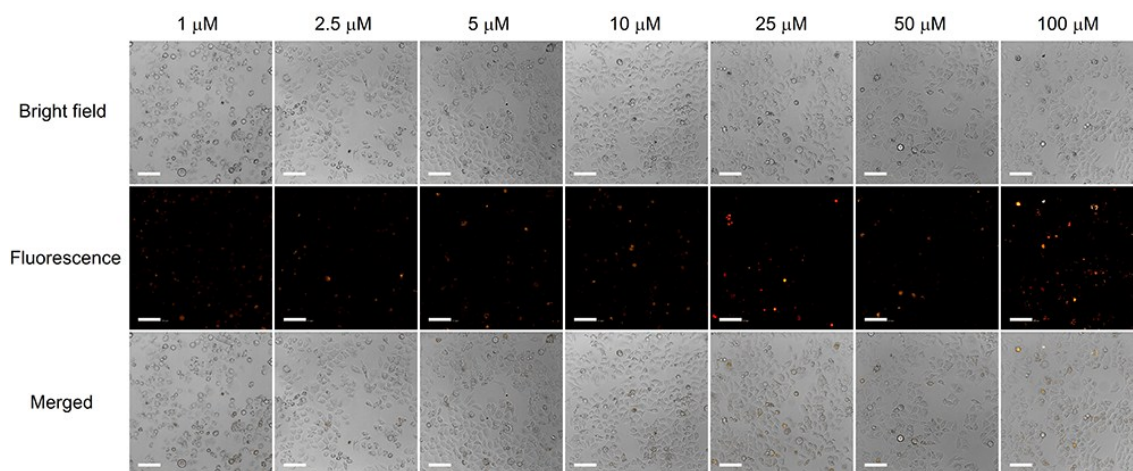

**Figure S10** Fluorescence images of HeLa cells stained with different concentrations of DSS-5-Cl in 30 min. Scale bar 100  $\mu$ m.

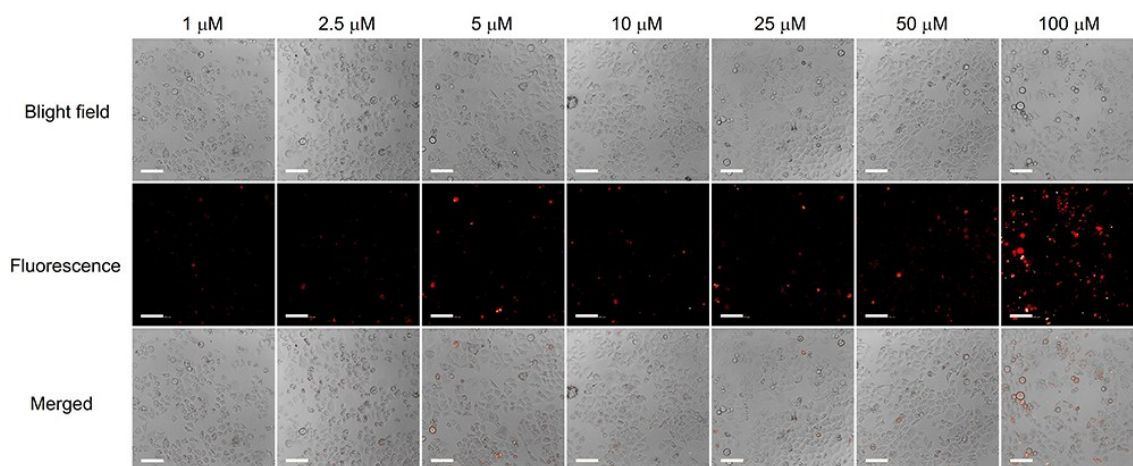

**Figure S11** Fluorescence images of HeLa cells stained with different concentrations of DSS-5-Br in 30 min. Scale bar 100  $\mu$ m.

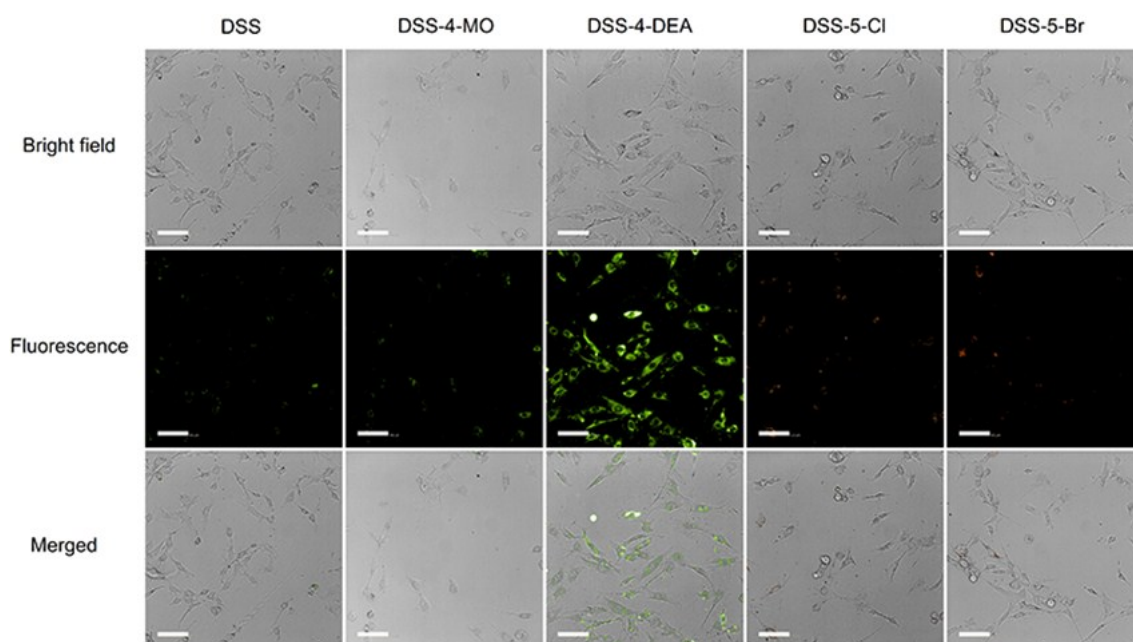

**Figure S12** Fluorescence images of C3H10 T1/2 cells stained 25  $\mu$ M of DSS and four derivatives in 30 min. Scale bar 100  $\mu$ m.

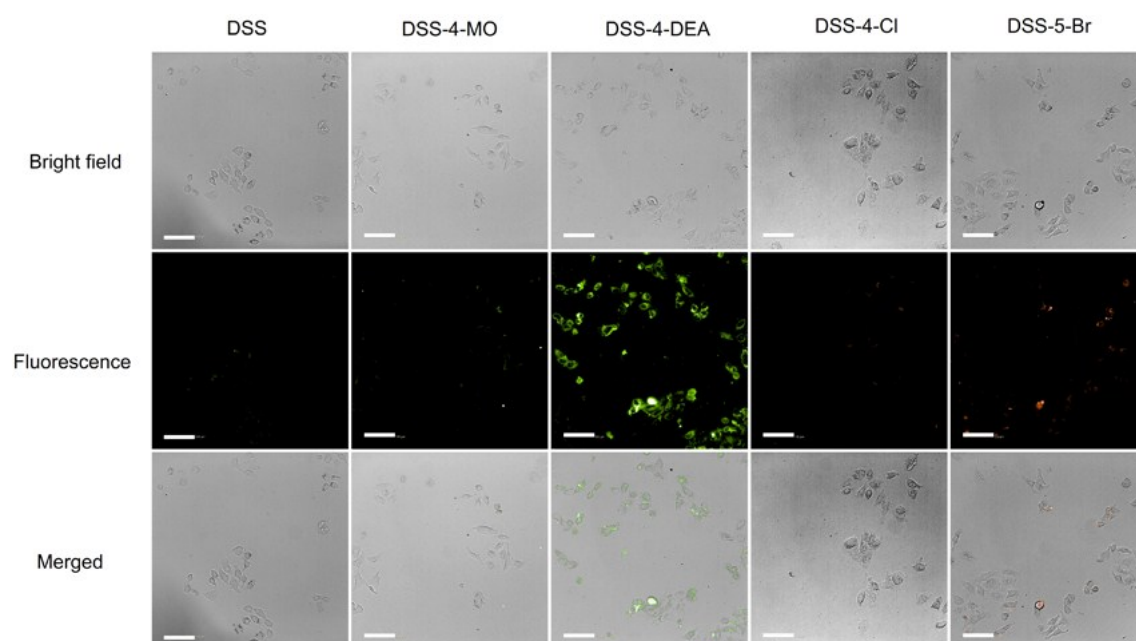

**Figure S13** Fluorescence images of LO2 cells stained 25  $\mu$ M of DSS and four derivatives in 30 min. Scale bar 100  $\mu$ m.

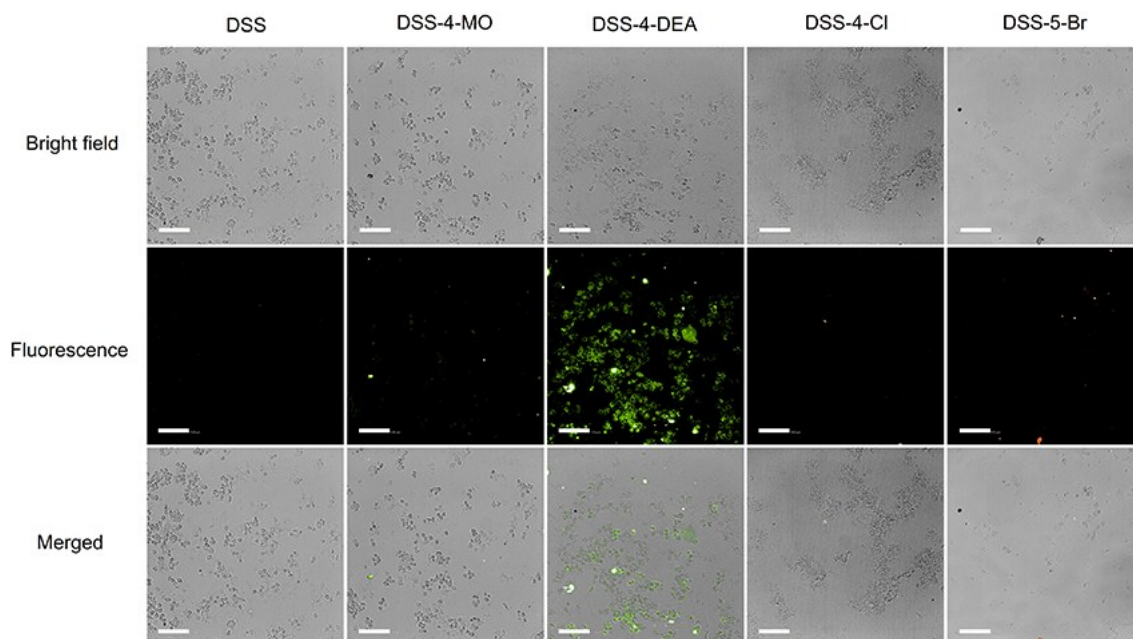

**Figure S14** Fluorescence images of RAW 246.7 cells stained 25  $\mu$ M of DSS and four derivatives in 30 min. Scale bar 100  $\mu$ m.

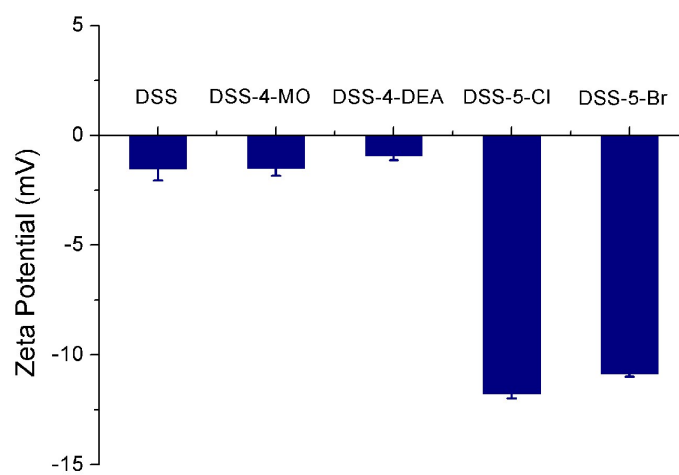

**Figure S15** Zeta potential of the DSS and the four derivatives (DMSO/water, water fraction 99%).

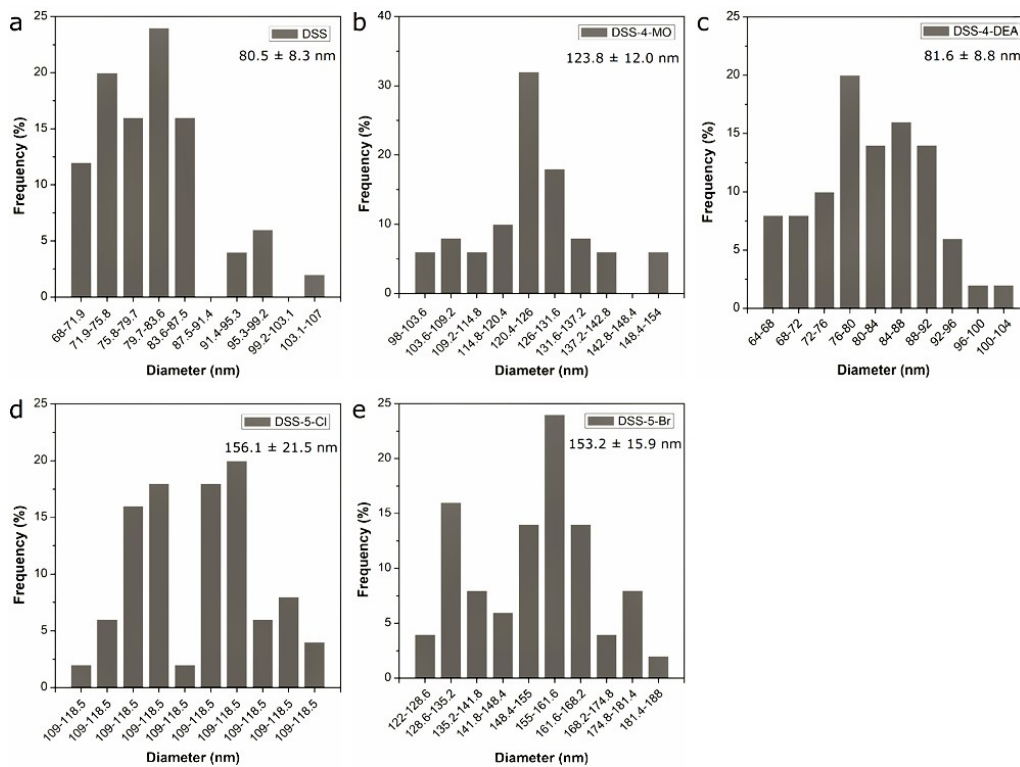

**Figure S16** The average size and statistically size distribution ( $n = 50$ ) of DSS and the four derivatives (DMSO/Imaging medium, water fraction 99%). (a-e) DSS, DSS-4-MO, DSS-4-DEA, DSS-5-Cl, DSS-5-Br.

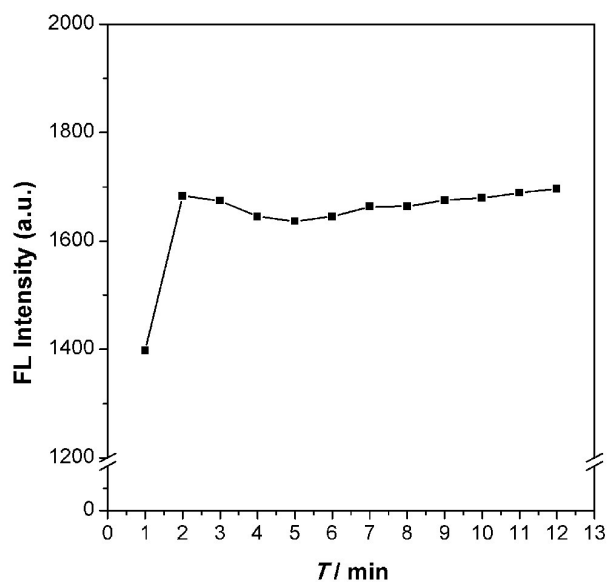

**Figure S17** The stability of the fluorescence of DSS-4-DEA in the DMSO/water solutions (water fraction 99%).

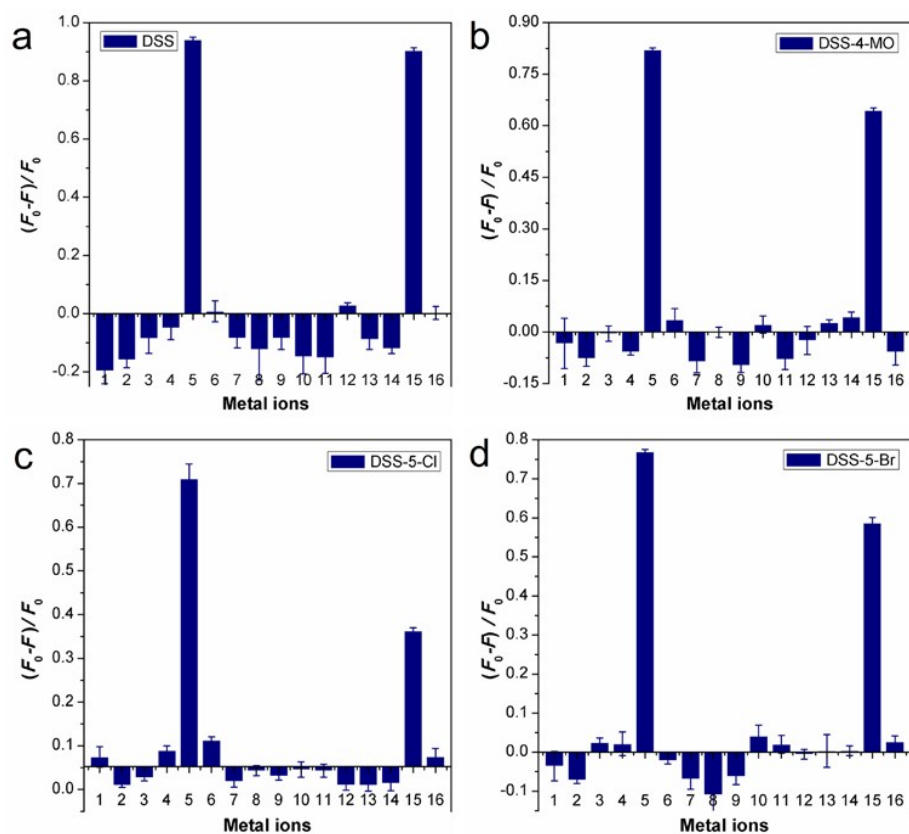

**Figure S18** Metal ions induced fluorescence quench of the (a) DSS, (b) DSS-4-MO, (c) DSS-5-Cl, (d) DSS-5-Br (1-16: 1  $\text{Ca}^{2+}$ , 2  $\text{Cd}^{2+}$ , 3  $\text{Co}^{2+}$ , 4  $\text{Cr}^{3+}$ , 5  $\text{Cu}^{2+}$ , 6  $\text{Fe}^{2+}$ , 7  $\text{Fe}^{3+}$ , 8  $\text{K}^+$ , 9  $\text{Mg}^{2+}$ , 10  $\text{Mn}^{2+}$ , 11  $\text{Na}^+$ , 12  $\text{Ni}^{2+}$ , 13  $\text{Pb}^{2+}$ , 14  $\text{Zn}^{2+}$ , 15 all metal ions 1-14, 16 all metal ions 1-14 except  $\text{Cu}^{2+}$ ).

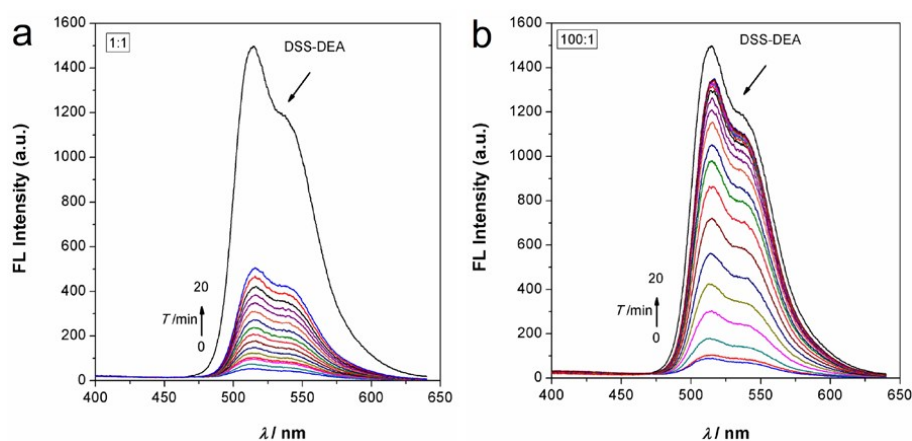

**Figure S19** EDTA-2Na induced fluorescence recovery in 20 min. (a) EDTA-2Na: $\text{Cu}^{2+}$  1:1, (b) EDTA-2Na: $\text{Cu}^{2+}$  100:1.

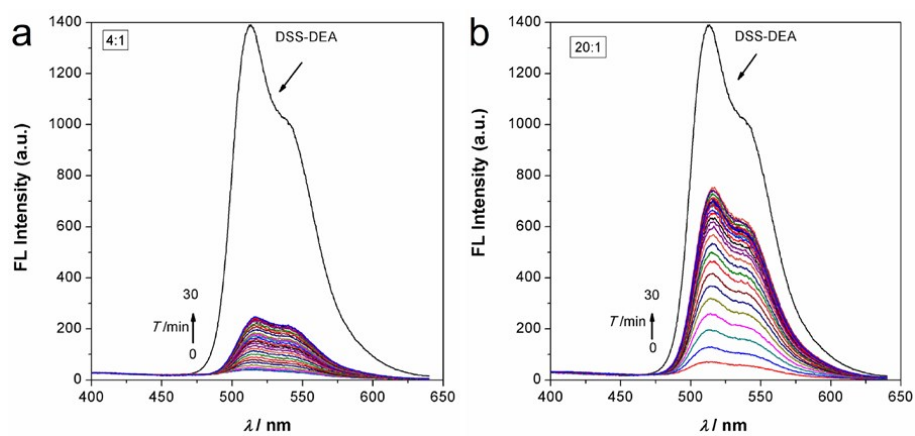

**Figure S20** PPI induced fluorescence recovery in 30 min. (a) PPI:Cu<sup>2+</sup> 4:1, (b) PPI:Cu<sup>2+</sup> 20:1.
